# Supplementary material for: Novel α-N-heterocyclic thiosemicarbazone complexes: synthesis, characterization, and antimicrobial of properties investigation
Source: Royal Society of Chemistry journal article supplement (doi:10.1039/d4ra04002c), 2024-01-01
Supplement: d4ra04002c1.pdf [file d4ra04002c1.pdf]

## Supporting Information

### Novel $\alpha$ -N-heterocyclic thiosemicarbazone complexes: Synthesis, characterization, and antimicrobial of properties investigation

Dilek Nartop<sup>a</sup>, Elvan Hasanoğlu Özkan<sup>b,\*</sup>, Hatice Ögütçü<sup>c</sup>, Nurdan Kurnaz Yetim<sup>d</sup>, İnci Özdemir<sup>e</sup>

<sup>a</sup>Department of Chemistry, Faculty of Arts and Sciences, Düzce University, Düzce, Türkiye ; e-mail : dileknartop@duzce.edu.tr

<sup>b</sup>Department of Chemistry, Faculty of Sciences, Gazi University, Ankara, Türkiye; e-mail : ehasanoglu@gazi.edu.tr

<sup>c</sup>Department of Field Crops, Faculty of Agriculture, Kırşehir Ahi Evran University, Kırşehir, Türkiye; e-mail : hogutcu@ahievran.edu.tr

<sup>d</sup>Department of Chemistry, Faculty of Arts and Sciences, Kırklareli University, Kırklareli, Türkiye; e-mail : nurdankurnazyetim@klu.edu.tr

<sup>e</sup>Kocaeli University, Izmit Vocational School, Property Protection and Security Department, 41285, Kocaeli, Türkiye; e-mail : inci.ozdemir@kocaeli.edu.tr

#### List of contents

|                                                                                                                                                                                                                                      |           |
|--------------------------------------------------------------------------------------------------------------------------------------------------------------------------------------------------------------------------------------|-----------|
| IR spectra of the heterocyclic thiosemicarbazone complexes ( <b>H<sub>1</sub>Ni, H<sub>2</sub>Ni, H<sub>3</sub>Ni, H<sub>4</sub>Ni, H<sub>1</sub>Cu, H<sub>2</sub>Cu, H<sub>3</sub>Cu, H<sub>4</sub>Cu</b> ).....                    | Figure S1 |
| <sup>1</sup> H-NMR spectra of the heterocyclic thiosemicarbazone complexes ( <b>H<sub>1</sub>Ni, H<sub>2</sub>Ni, H<sub>3</sub>Ni, H<sub>4</sub>Ni, H<sub>1</sub>Cu, H<sub>2</sub>Cu, H<sub>3</sub>Cu, H<sub>4</sub>Cu</b> ).....    | Figure S2 |
| <b>Figure S3.</b> TGA spectra of the heterocyclic thiosemicarbazone complexes ( <b>H<sub>1</sub>Ni, H<sub>2</sub>Ni, H<sub>3</sub>Ni, H<sub>4</sub>Ni, H<sub>1</sub>Cu, H<sub>2</sub>Cu, H<sub>3</sub>Cu, H<sub>4</sub>Cu</b> )..... | Figure S3 |

#### Supplementary Material

Herein, IR, <sup>1</sup>H-NMR, and TGA spectra of the heterocyclic thiosemicarbazone complexes(**H<sub>1</sub>Ni, H<sub>2</sub>Ni, H<sub>3</sub>Ni, H<sub>4</sub>Ni, H<sub>1</sub>Cu, H<sub>2</sub>Cu, H<sub>3</sub>Cu, H<sub>4</sub>Cu**)

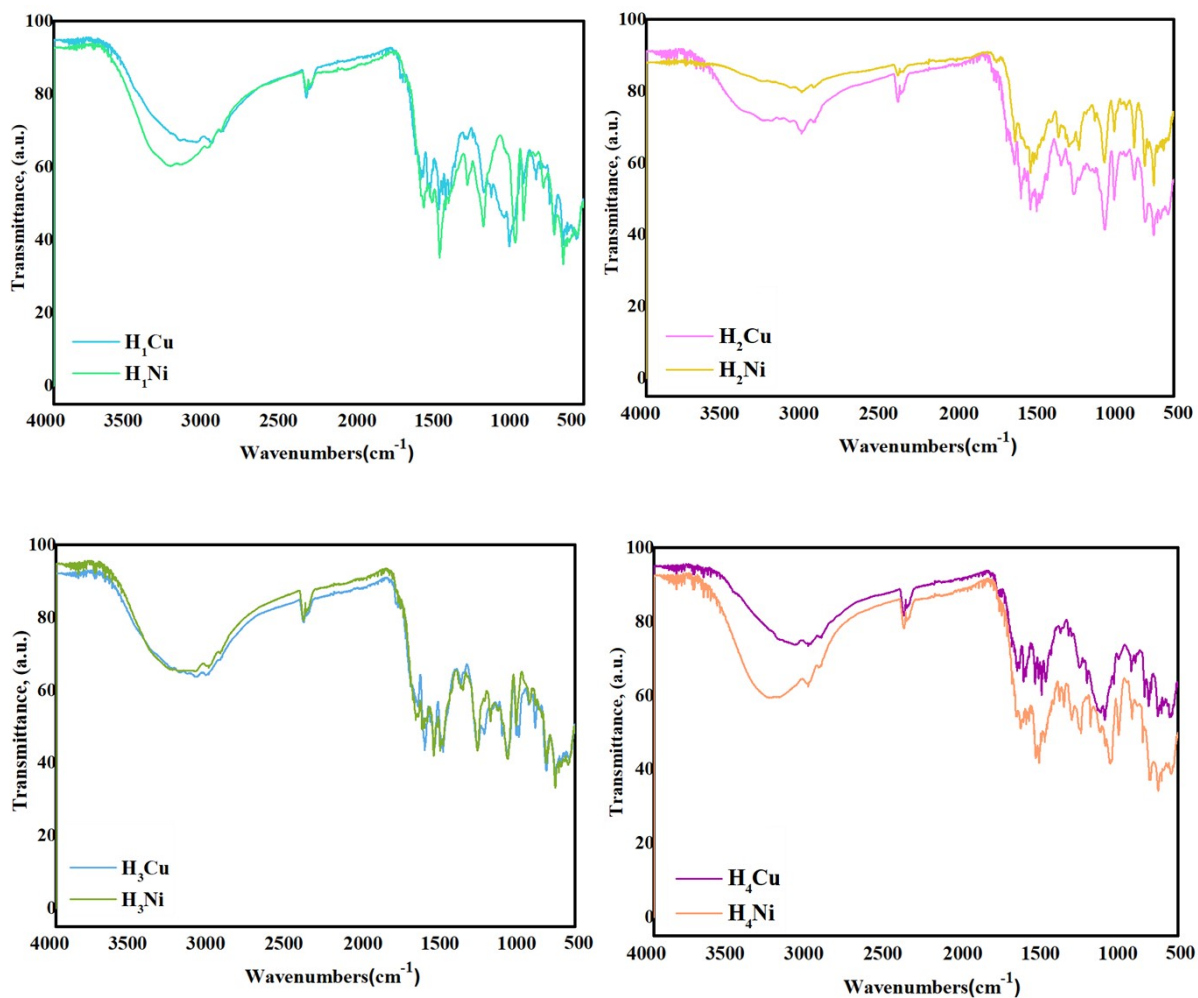

**Fig. S1.** IR spectra of the heterocyclic thiosemicarbazone complexes (**H<sub>1</sub>Ni**, **H<sub>2</sub>Ni**, **H<sub>3</sub>Ni**, **H<sub>4</sub>Ni**, **H<sub>1</sub>Cu**, **H<sub>2</sub>Cu**, **H<sub>3</sub>Cu**, **H<sub>4</sub>Cu**)

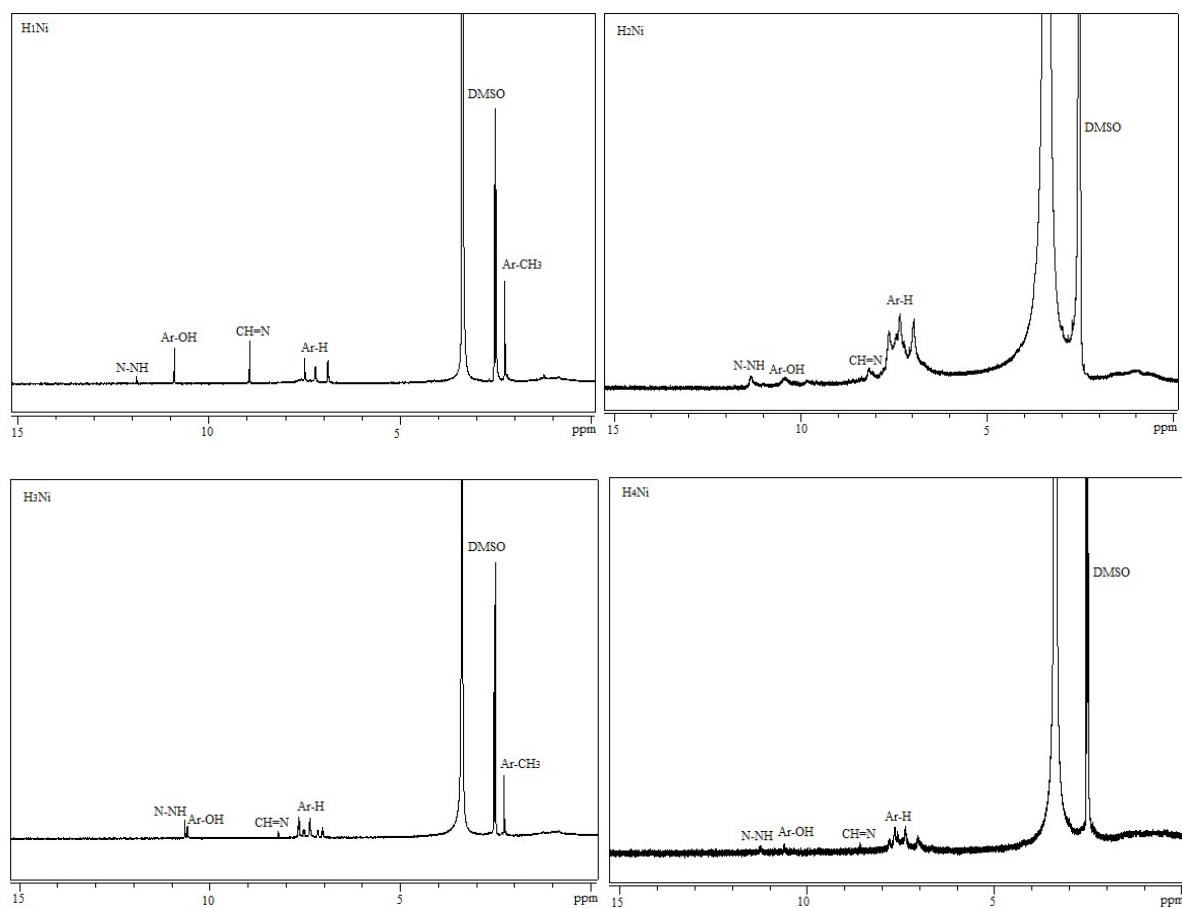

**Fig. S2.**  $^1\text{H-NMR}$  spectra of the heterocyclic thiosemicarbazone complexes ( $\text{H}_1\text{Ni}$ ,  $\text{H}_2\text{Ni}$ ,  $\text{H}_3\text{Ni}$ ,  $\text{H}_4\text{Ni}$ )

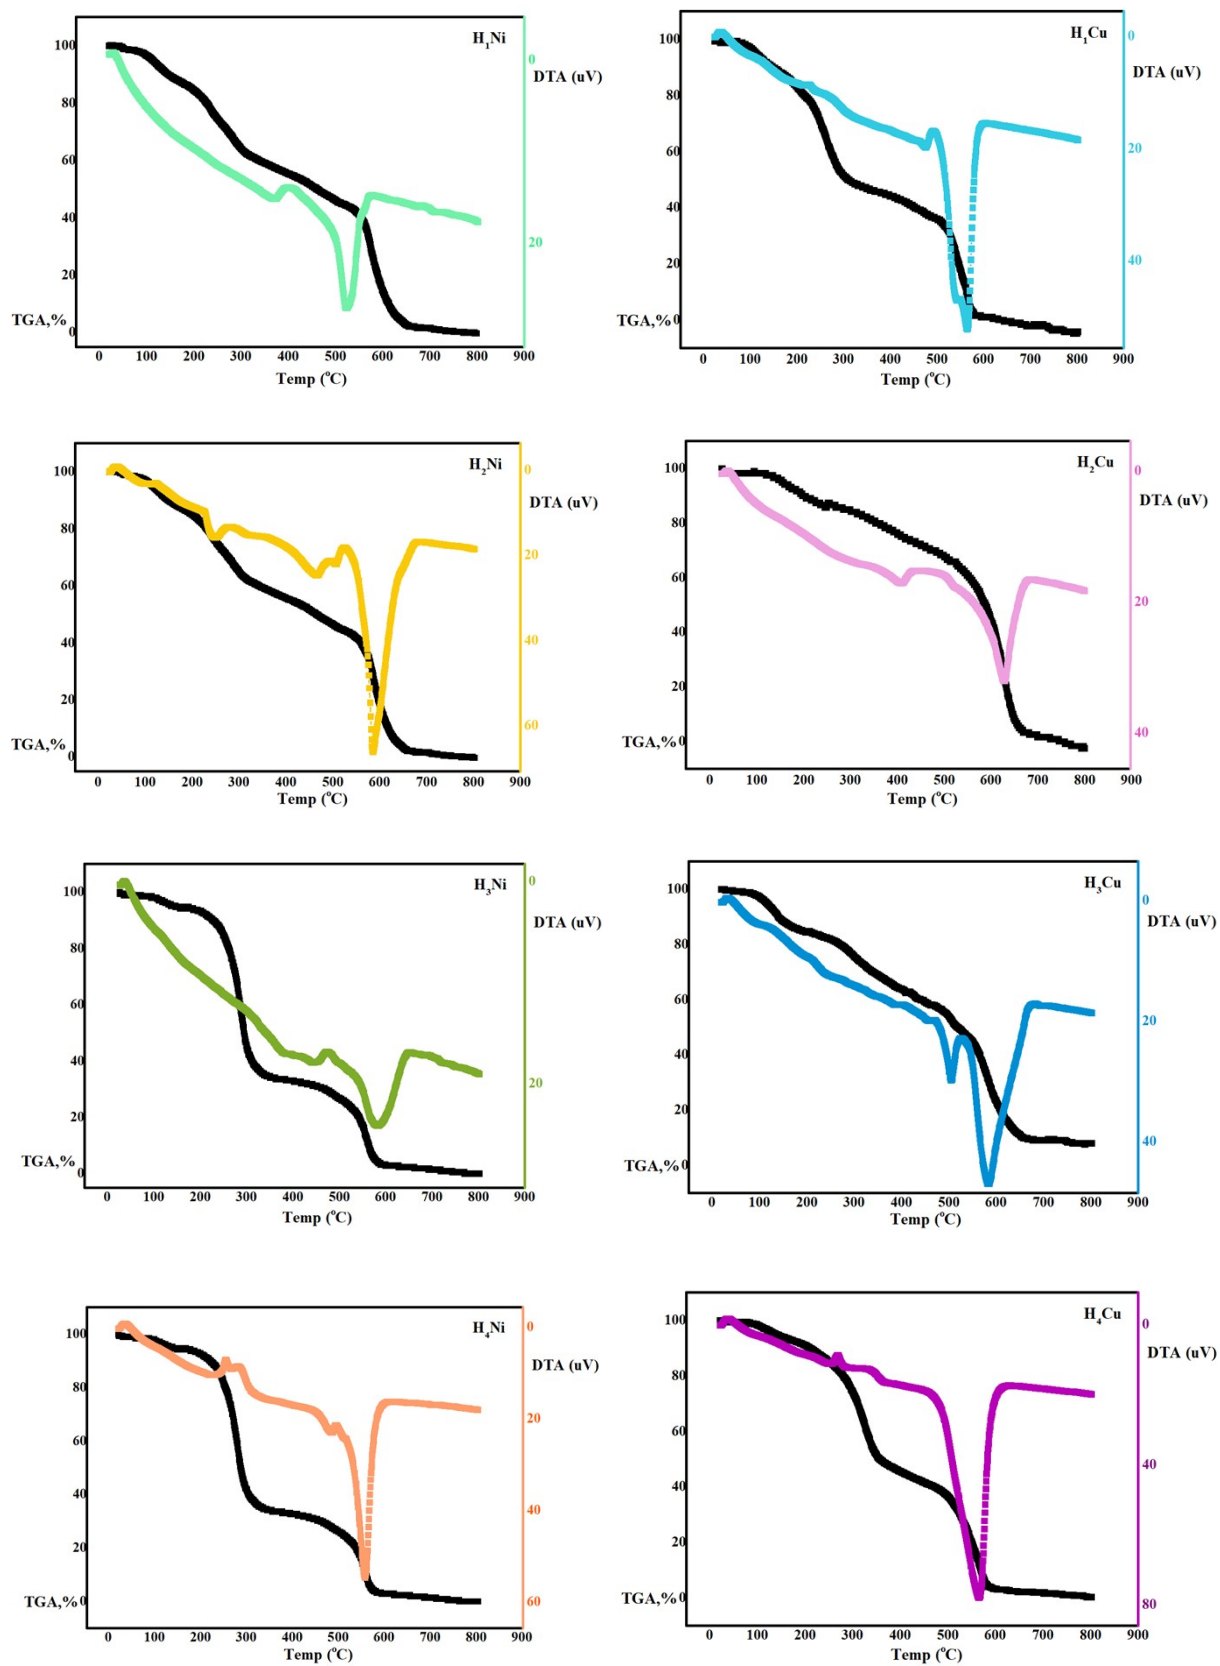

**Fig. S3.** TGA spectra of the heterocyclic thiosemicarbazone complexes (H<sub>1</sub>Ni, H<sub>2</sub>Ni, H<sub>3</sub>Ni, H<sub>4</sub>Ni, H<sub>1</sub>Cu, H<sub>2</sub>Cu, H<sub>3</sub>Cu, H<sub>4</sub>Cu)
